# Supplementary material for: Ochratoxin A Defective Aspergillus carbonarius Mutants as Potential Biocontrol Agents
Source: MDPI journal article supplement (doi:10.3390/toxins14110745), 2022-10-31
Supplement: s1 [file s1]

**A**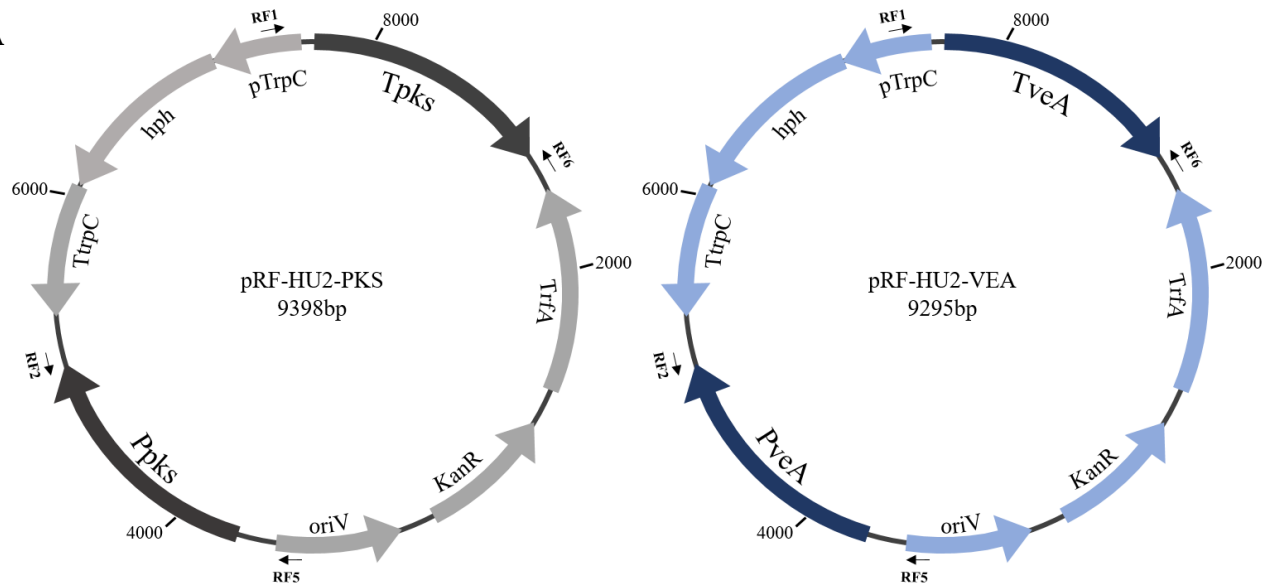**B**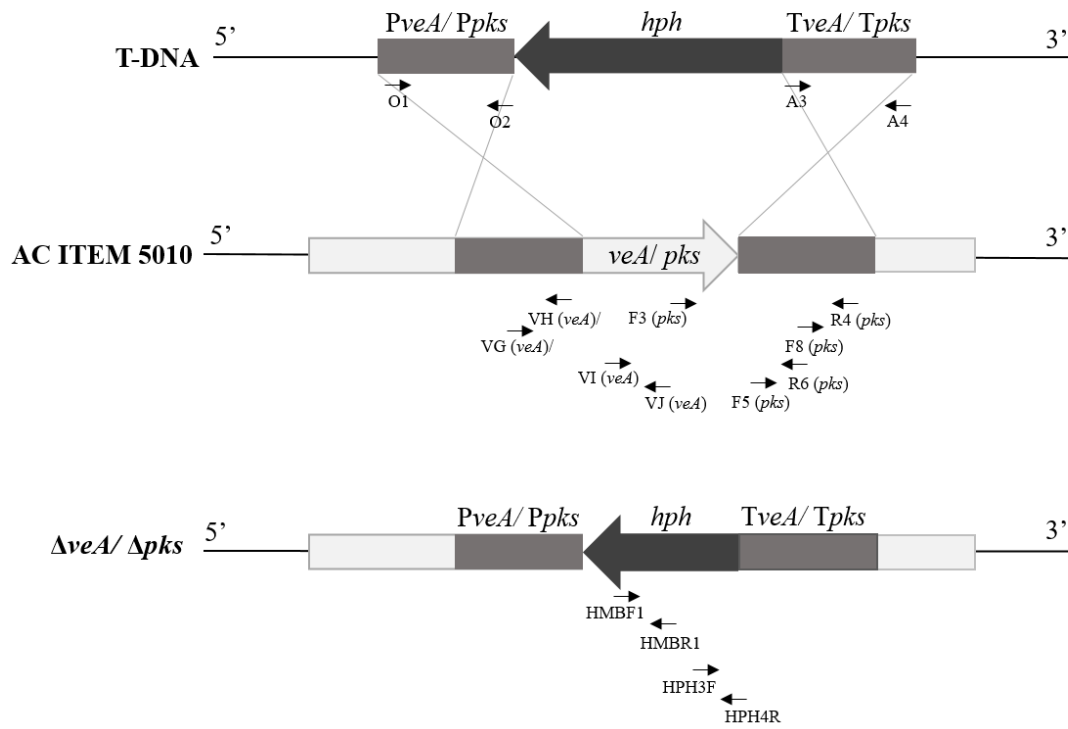

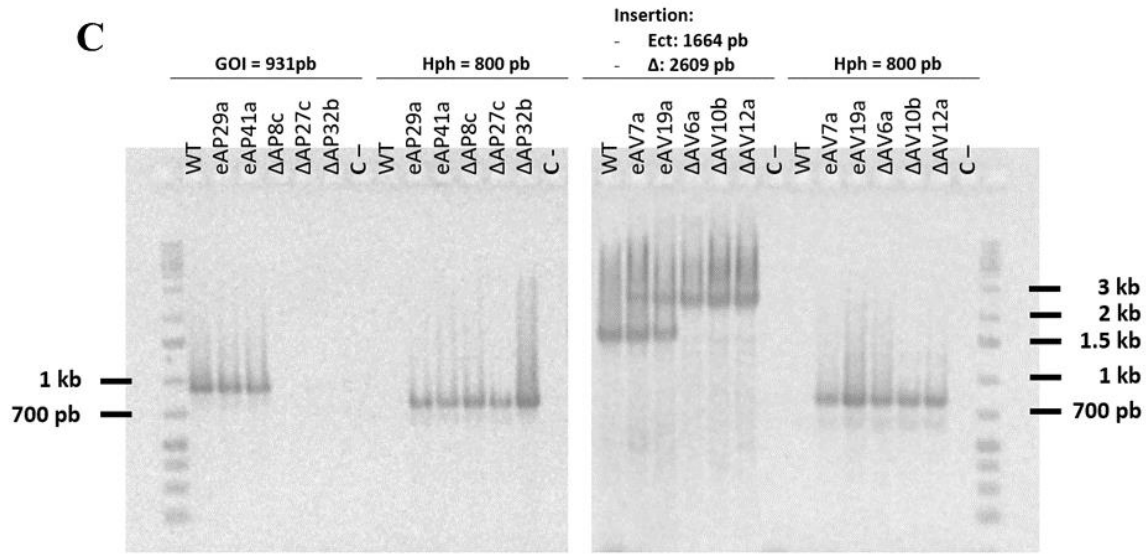

**Figure S1.** Deletion of the *pks* and *veA* genes in *Aspergillus carbonarius*. (A) Physical maps of plasmids pRFHU2-PKS and pRFHU2-VEA. (B) Diagram of the deletion cassette used to replace the target region (gene of interest, GOI) in the wild-type strain by the hygromycin resistant marker (Hph) by homologous recombination, generating  $\Delta pks$  and  $\Delta veA$  mutants. Primers used in the construction and the analysis of both plasmids are shown. (C) Amplification band patterns of the different polymerase chain reactions (PCR): gene of interest (GOI) analysis of the mutants in the *otaA* (*pks*) and *veA* gene in the left and right panels, respectively. Analyses were performed for wild-type (wt) ITEM 5010, two ectopic mutants (preceded by the letter "e") and three knockout mutants (preceded by the symbol " $\Delta$ ").

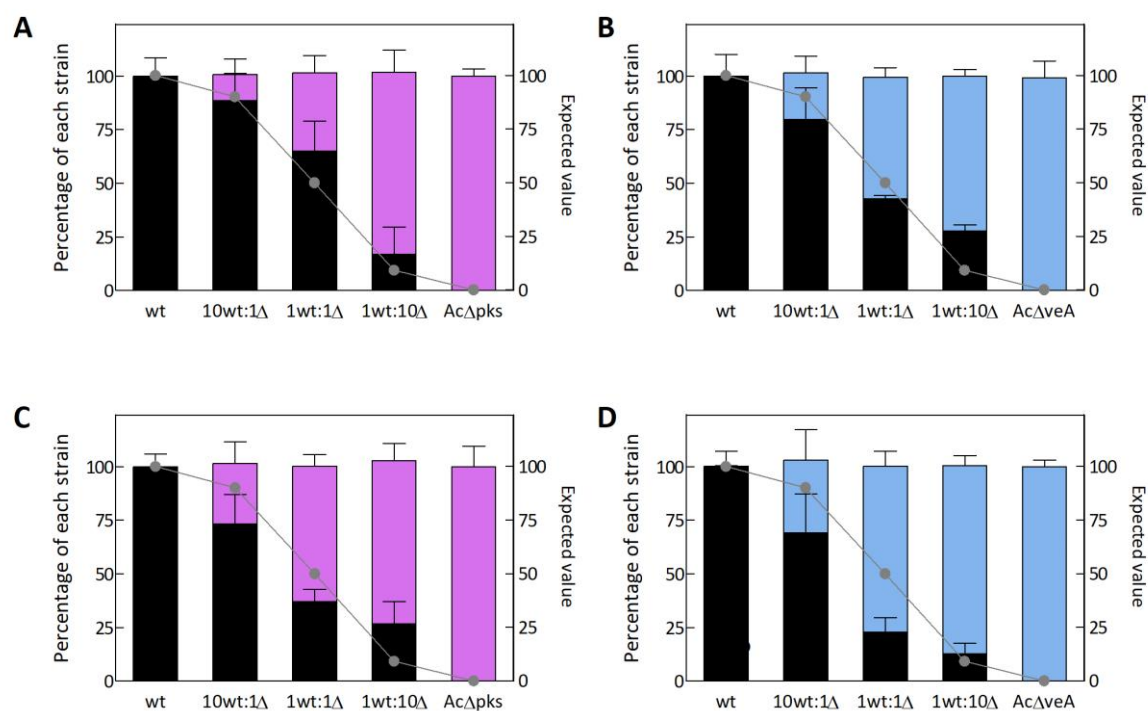

**Figure S2.** Competitiveness of  $\Delta pks$  (A-C, pink bars) and  $\Delta veA$  (B-D, blue bars) knockout mutants against the mycotoxigenic wild-type strain *A. carbonarius* ITEM 5010 (black bars) at day 0 (A-B) and 7 days' post inoculation (C-D). Competitiveness was determined by counting colonies on PDA and PDA supplemented with 100  $\mu\text{g}/\text{mL}$  of hygromycin. Only knockout mutants are able to grow on PDA supplemented with the antibiotic. Values are the mean of at least three biological replicates and error bars represent the standard error of the mean (SEM).

**Table S1.** Estimation of the number of T-DNA copies that have been integrated into the genome of the mutants.

| Strain    | Genotype  | Cq goi       | Cq NRPS      | Estimated T-DNA copy number |
|-----------|-----------|--------------|--------------|-----------------------------|
| ITEM 5010 | Wild type | 23.41 ± 0.29 | 21.37 ± 0.05 | -                           |
| Epks29a   | Ectopic   | 22.37 ± 0.01 | 21.15 ± 0.26 | 1                           |
| Epks41a   | Ectopic   | 22.24 ± 0.14 | 21.16 ± 0.09 | 1                           |
| Δpks8a    | knockout  | 23.27 ± 0.30 | 21.29 ± 0.08 | 1                           |
| Δpks27c   | knockout  | 23.87 ± 0.14 | 21.46 ± 0.12 | 1                           |
| Δpks32b   | knockout  | 23.75 ± 0.11 | 21.04 ± 0.24 | 1                           |
| ITEM 5010 | Wild type | 22.90 ± 0.36 | 22.85 ± 0.29 | -                           |
| EveA7a    | Ectopic   | 21.68 ± 0.44 | 23.11 ± 0.62 | 1                           |
| EveA9a    | Ectopic   | 19.34 ± 0.10 | 22.11 ± 0.12 | 4                           |
| ΔveA6a    | knockout  | 23.23 ± 0.16 | 23.51 ± 0.07 | 1                           |
| ΔveA10b   | knockout  | 21.89 ± 0.24 | 21.97 ± 0.05 | 1                           |
| ΔveA12a   | knockout  | 22.10 ± 0.23 | 22.10 ± 0.27 | 1                           |

**Table S2.** List of primers used in this study.

| Name                      | Sequence (5' → 3')                | Description                                          |
|---------------------------|-----------------------------------|------------------------------------------------------|
| <b><i>Δpks</i> mutant</b> |                                   |                                                      |
| OTApks_O1                 | GGTCTTAAUGCTCTATATCGCGCGCAAAG     | Amplification of upstream region                     |
| OTApks_O2                 | GGCATTAAUUGCCCCGGCTTCTTAAGACTT    | Amplification of upstream region                     |
| OTApks_A3                 | GGACTTAAUCCGCCCTCTCGAGTGTAAG      | Amplification of downstream region                   |
| OTApks_A4                 | GGGTTTAAUUGGTTGGTCTTTGGCGTAGA     | Amplification of downstream region                   |
| OTApks-F3                 | GAACCATTTCCGACCTTCT               | Screening gene deletion                              |
| OTApks-R4                 | TTCGAGGATGGCAAGTAGA               | Screening gene deletion, T-DNA copy number           |
| OTApks-F5                 | AGAAGTGTAGTGCGCTGGATG             | PCR (growth)                                         |
| OTApks-R6                 | ATCTGCACAGAGTTGCTTGG              | PCR (growth)                                         |
| OTApks-F8                 | CAACTATTCGGCAGCCAACG              | T-DNA copy number                                    |
| <b><i>ΔveA</i> mutant</b> |                                   |                                                      |
| veA-VA-O1                 | GGTCTTAAUCCGAGGTCCAAAGATGGCAGGAC  | Amplification of upstream region <sup>1</sup>        |
| veA-VA-O2                 | GGCATTAAUACATTGCATGCGGGGGATCGATG  | Amplification of upstream region <sup>1</sup>        |
| veA-VA-A3                 | GGACTTAAUCAGATTGACCCGACTCCGAACGAC | Amplification of downstream region <sup>1</sup>      |
| veA-VA-A4                 | GGGTTTAAUTGGTCCAGCTCTTCGGCGTCATC  | Amplification of downstream region <sup>1</sup>      |
| veA-VI                    | TCCCGGTTCTCACAGGCGTA              | Screening gene deletion <sup>1</sup>                 |
| veA-VJ                    | GCTGTCCTTGGTCTCCTCGTA             | Screening gene deletion <sup>1</sup>                 |
| veA-VG                    | GAGTACACCGGCTGGTGGTTAGGA          | T-DNA copy number <sup>1</sup>                       |
| veA-VH                    | TCTTTCCATCGCGGTGATTCCGGCT         | T-DNA copy number <sup>1</sup>                       |
| <b>Other primers</b>      |                                   |                                                      |
| RF-1                      | AAATTTTGTGCTCACCGCCTGGAC          | <i>E. coli</i> colonies selection and DNA sequencing |
| RF-2                      | TCTCCTTGCATGCACCATTCCTTG          | <i>E. coli</i> colonies selection and DNA sequencing |
| RF-5                      | GTTTGCAGGGCCATAGAC                | <i>E. coli</i> colonies selection and DNA sequencing |
| RF-6                      | ACGCCAGGGTTTTCCAGTC               | <i>E. coli</i> colonies selection and DNA sequencing |
| HMBF1                     | CTGTCGAGAAGTTTCTGATCG             | Screening insertion resistant marker                 |
| HMBR1                     | CTGATAGAGTTGGTCAAGACC             | Screening insertion resistant marker                 |
| HPH3F                     | TATGTCCTGCGGGTAAATAGCTG           | PCR (growth)                                         |
| HPH4R                     | GAGATGCAATAGGTCAGGCTCTC           | PCR (growth)                                         |
| AcNRP_F                   | CTCCACCCATCCTCCCGTTC              | <i>nrps</i> as reference gene <sup>1</sup>           |
| AcNRP_R                   | AATCCATGTCCTCACCATCGC             | <i>nrps</i> as reference gene <sup>1</sup>           |

<sup>1</sup> Crespo-Sempere, A.; Marín, S.; Sanchis, V.; Ramos, A.J. VeA and LaeA Transcriptional Factors Regulate Ochratoxin A Biosynthesis in *Aspergillus Carbonarius*. Int. J. Food Microbiol. 2013, 166, 479–486, doi:10.1016/j.ijfoodmicro.2013.07.027.
